# Supplementary material for: Identify latent chromosomal aberrations relevant to myelodysplastic syndromes
Source: PubMed Central journal article supplement (PMC5583229; doi:10.1038/s41598-017-10551-3), 2017-09-04
Supplement: 41598_2017_10551_MOESM1_ESM.pdf [file 41598_2017_10551_MOESM1_ESM.pdf]

**Identify latent chromosomal aberrations relevant to myelodysplastic  
syndromes**

**Qibin Song<sup>1\*</sup>, Yuxin Chu<sup>1</sup>, Yi Yao<sup>1</sup>, Min Peng<sup>1</sup>, Weihong Yang<sup>2</sup>, Xiaoqing Li<sup>2</sup>, Shiang Huang<sup>2</sup>**

**Case 1#**, female, 71 years old, sAML

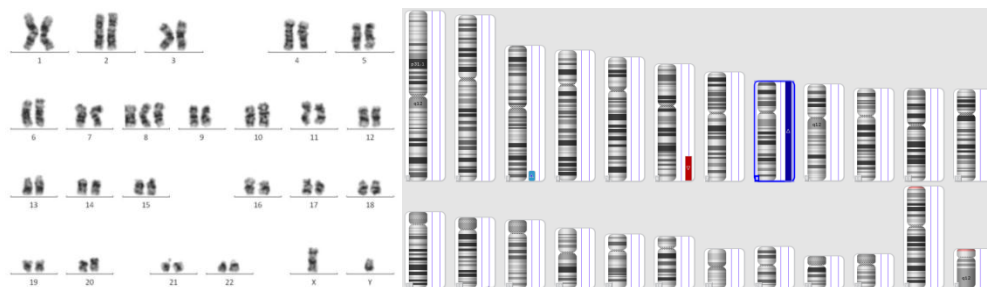

**Figure S1.1:**Abnormal Metaphase Cytogenetics indicates 47,XX,+8[20]

**Figure S1.2:**SNP-A results indicate Gain(3q27.1-qter), Loss(6q23.2-qter), Gain(8)

**Table S1:**Chromosomal lesions detected by SNP-A in Case 1#.

| Type       | Microarray Nomenclature                             | Size(Kbp) | CN state |
|------------|-----------------------------------------------------|-----------|----------|
| GainMosaic | arr[hg19]<br>3q27.1q29(183,344,691-197,851,444)x2-3 | 14506     | 2.8      |
| Loss       | arr[hg19]<br>6q23.2q27(135,160,366-170,914,297)x1   | 35754     | 1        |
| Gain       | arr[hg19]<br>8p23.3q24.3(158,048-146,295,771)x3     | 146138    | 3        |

**Case 2#**, male, 86 years old, sAML

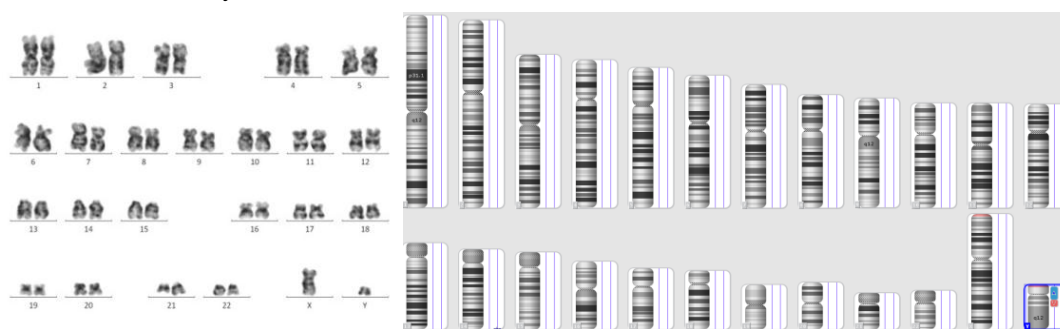

**Figure S2.1:**Abnormal Metaphase Cytogenetics indicates 46,XY,t(3;21)(q26;q22)[19]/46,XY[1]

**Figure S2.2:** SNP-A results indicate GainMosaic(Yq11.222-pter), LossMosaic(Yq11.222-qter), and Gain(14q32.33).

**Table S2:**Chromosomal lesions detected by SNP-A in Case 2#.

| Type       | Microarray Nomenclature                                | Size(Kbp) | CN state |
|------------|--------------------------------------------------------|-----------|----------|
| Gain       | arr[hg19]<br>14q32.33(106,251,069-106,769,864)x3       | 519       | 3        |
| GainMosaic | arr[hg19]<br>Yp11.31q11.222(2,650,424-19,972,006)x1-2  | 17321     | 1.5      |
| LossMosaic | arr[hg19]<br>Yq11.222q11.23(19,975,331-28,799,654)x0-1 | 8824      | 0.5      |

**Case 3#**, male, 69 years old, RAEB-2

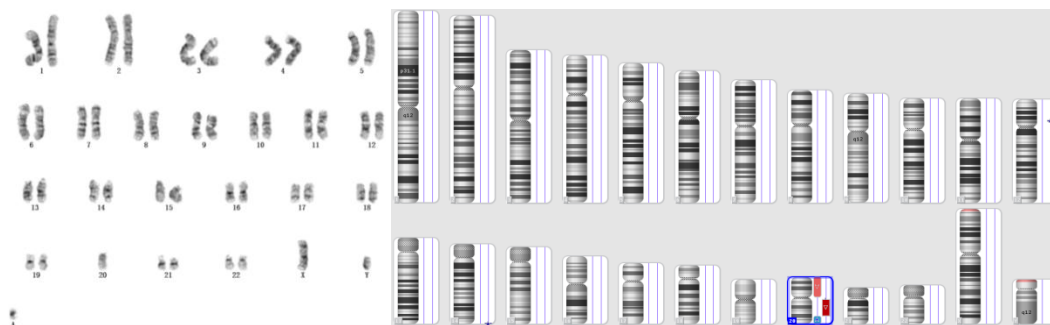

**Figure S3.1:** Abnormal Metaphase Cytogenetics indicates 46,XY,-20,+mar[16]/46,XY[4]

**Figure S3.2:** SNP-A results indicate LossMosaic(20p13p11.1), Loss(20q11.21q13.2), GainMosaic(20q13.2qter).

**Table S3:** Chromosomal lesions detected by SNP-A in Case 3#.

| Type       | Microarray Nomenclature                               | Size(Kbp) | CN state |
|------------|-------------------------------------------------------|-----------|----------|
| LossMosaic | arr[hg19]<br>20p13p11.1(61,661-26,305,478)x1-2        | 26244     | 1.2      |
| Loss       | arr[hg19]<br>20q11.21q13.2(30,947,118-52,423,569)x1   | 21476     | 1        |
| GainMosaic | arr[hg19]<br>20q13.2q13.33(53,178,091-62,913,645)x2-3 | 9735      | 2.4      |

**Case 4#**, male, 81years old, RCMD

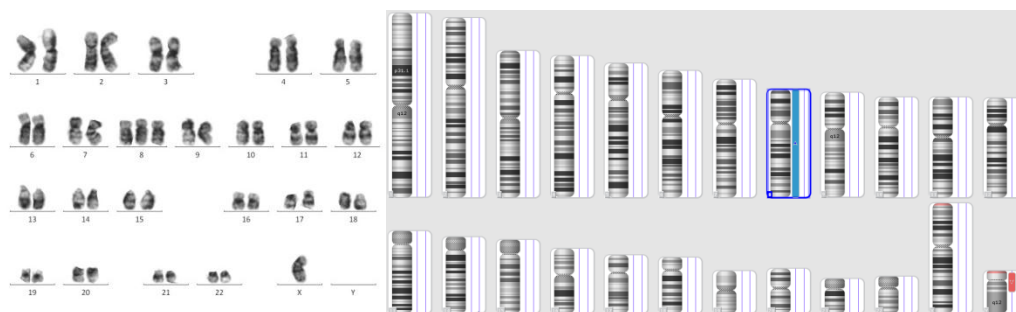

**Figure S4.1:** Abnormal Metaphase Cytogenetics indicates 46,X,-Y,+8[12]/46,XY[8].

**Figure S4.2:** SNP-A results indicate trisomy 8, Loss(Yp11.31q11.23).

**Table S4:** Chromosomal lesions detected by SNP-A in Case 4#.

| Type       | Microarray Nomenclature                              | Size(Kbp) | CN state |
|------------|------------------------------------------------------|-----------|----------|
| GainMosaic | arr[hg19]<br>8p23.3q24.3(158,048-146,295,771)x2-3    | 146137    | 2.3      |
| LossMosaic | arr[hg19]<br>Yp11.31q11.23(2,650,424-28,799,654)x0-1 | 26149     | 0.25     |

**Case 5#**, female, 60years old, RCMD

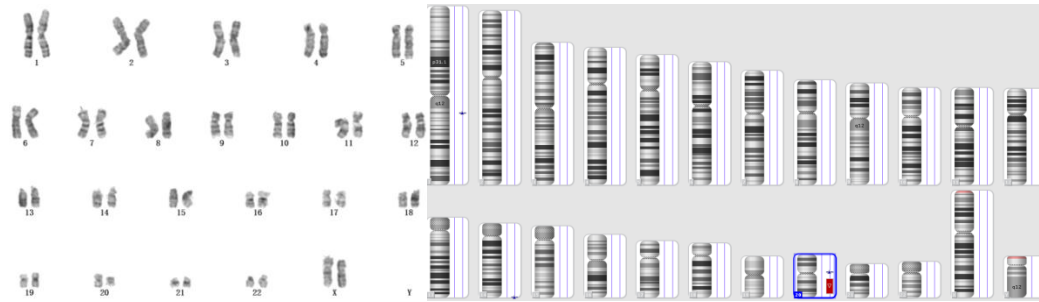

**Figure S5.1:** Abnormal Metaphase Cytogenetics indicates 46,XX,del(20)(q11)[20].

**Figure S5.2:** SNP-A results indicate Gain(1q21.2), Gain(20p11.1), Loss(20q11.23q13.32).

**Table S5:** Chromosomal lesions detected by SNP-A in Case 5#.

| Type | Microarray Nomenclature                              | Size(Kbp) | CN state |
|------|------------------------------------------------------|-----------|----------|
| Gain | arr[hg19]<br>1q21.2(148,545,141-149,733,322)x3       | 1188      | 3        |
| Gain | arr[hg19]<br>20p11.1(25,663,183-26,076,490)x3        | 413       | 3        |
| Loss | arr[hg19]<br>20q11.23q13.32(35,603,579-56,680,689)x1 | 21077     | 1        |

**Case 6#**, male, 85years old, RAEB-1

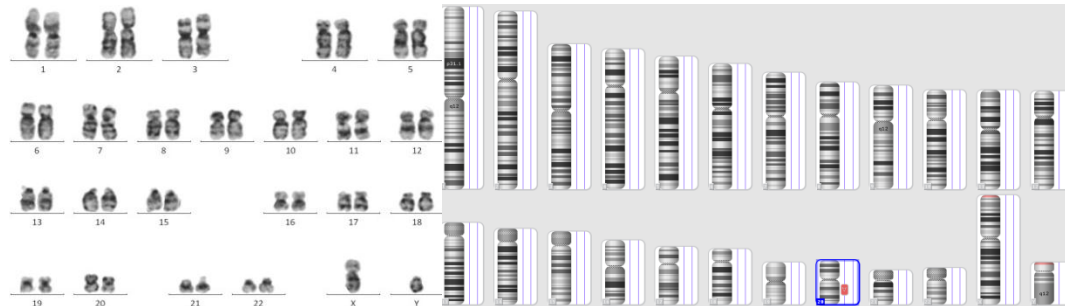

**Figure S6.1:** Normal Metaphase Cytogenetics indicates 46,XY[20].

**Figure S6.2:** SNP-A results indicate cryptic Loss(20q11.23q13.33).

**Table S6:** Chromosomal lesions detected by SNP-A in Case 6#.

| Type       | Microarray Nomenclature                                | Size(Kbp) | CN state |
|------------|--------------------------------------------------------|-----------|----------|
| LossMosaic | arr[hg19]<br>20q11.23q13.13(34,585,051-48,970,638)x1-2 | 14,386    | 1.85     |

**Case 7#**, female, 71years old, RAEB-1

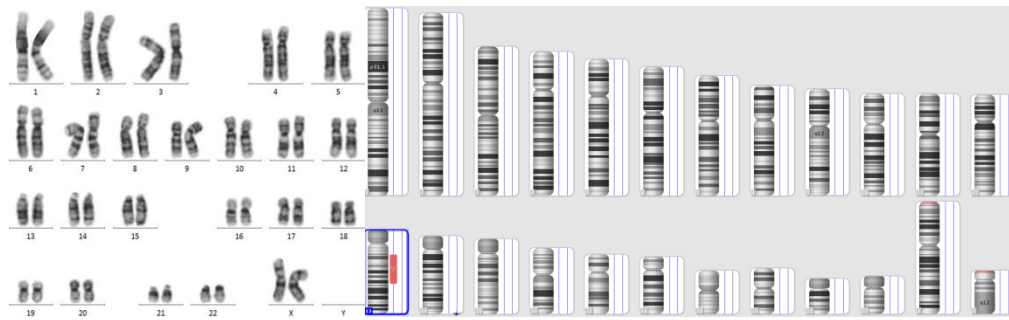

**Figure S7.1:** Normal Metaphase Cytogenetics indicates 46,XX [20].

**Figure S7.2:** SNP-A results indicate cryptic Loss(13q13.1-q21.33).

**Table S7:**Chromosomal lesions detected by SNP-A in Case 7#.

| Type       | Microarray Nomenclature                               | Size(Kbp) | CN state |
|------------|-------------------------------------------------------|-----------|----------|
| LossMosaic | arr[hg19]<br>13q13.1q21.33(33,520,119-73,254,426)x1-2 | 39,734    | 1.75     |

**Case 8#**, female, 51 years old, RA

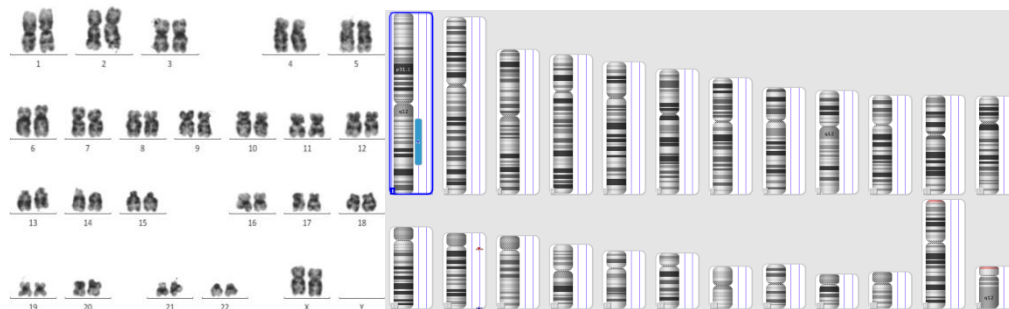

**Figure S8.1:** Normal Metaphase Cytogenetics indicates 46,XX [20].

**Figure S8.2:** SNP-A results indicate cryptic Gain(1q21.1-q32.2) and Loss(14q11.2).

**Table S8:**Chromosomal lesions detected by SNP-A in Case 8#.

| Type       | Microarray Nomenclature                               | Size(Kbp) | CN state |
|------------|-------------------------------------------------------|-----------|----------|
| GainMosaic | arr[hg19]<br>1q21.1q32.2(145,888,925-208,990,187)x2-3 | 63,101    | 2.43     |
| Loss       | arr[hg19]<br>14q11.2(22,448,722-22,970,327) x1        | 522       | 1        |

**Case 9#**, male, 31 years old, 5q- syndrome.

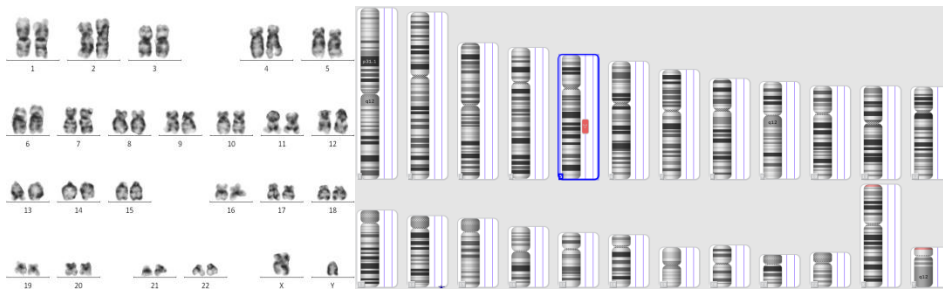

**Figure S9.1:** Normal Metaphase Cytogenetics indicates 46,XY [20].

**Figure S9.2:** SNP-A results indicate cryptic Loss(5q15-q22.3).

**Table S9:**Chromosomal lesions detected by SNP-A in Case 9#.

| Type       | Microarray Nomenclature                             | Size(Kbp) | CN state |
|------------|-----------------------------------------------------|-----------|----------|
| LossMosaic | arr[hg19]<br>5q15q22.3(94,204,970-114,496,815) x1-2 | 20,292    | 1.8      |

**Case 10#**, male, 78 years old, RARS

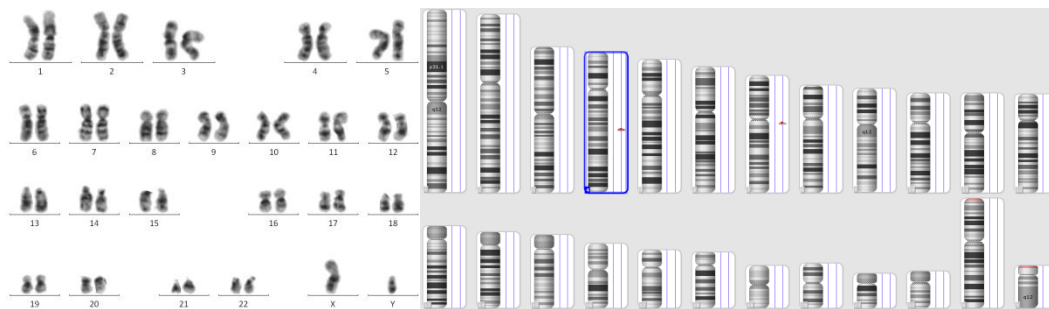

**Figure S10.1:** Normal Metaphase Cytogenetics indicates 46,XY [20].

**Figure S10.2:** SNP-A results indicate cryptic Loss(4q24).

**Table S10:**Chromosomal lesions detected by SNP-A in Case 10#.

| Type | Microarray Nomenclature                       | Size(Kbp) | CN state |
|------|-----------------------------------------------|-----------|----------|
| Loss | arr[hg19]<br>4q24(105,030,235-106,514,099)x1  | 1484      | 1        |
| Loss | arr[hg19]<br>7q11.21(64,651,296-65,148,399)x1 | 497       | 1        |

**Case 11#**, male, 86 years old, RCMD-RS

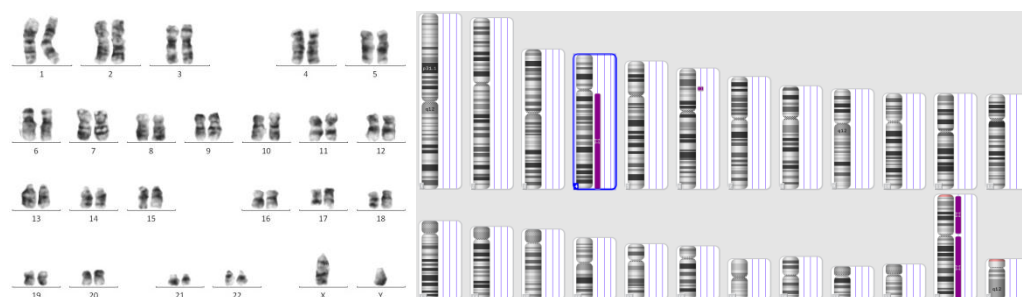

**Figure S11.1:** Normal Metaphase Cytogenetics indicates 46,XY [20].

**Figure S11.2:** SNP-A results indicate cryptic UPD(4q12-qter) and UPD(6p22.2p21.33).

**Table S11:**Chromosomal lesions detected by SNP-A in Case 11#.

| Type | Microarray Nomenclature                              | Size(Kbp) | CN state |
|------|------------------------------------------------------|-----------|----------|
| UPD  | arr[hg19]<br>4q12qter(55,497,445-190,921,709) hmz    | 135,424   | 2        |
| UPD  | arr[hg19]<br>6p22.2p21.33(25,944,802-31,916,916) hmz | 5,972     | 2        |

**Case 12#**, female, 9 years old, RARS

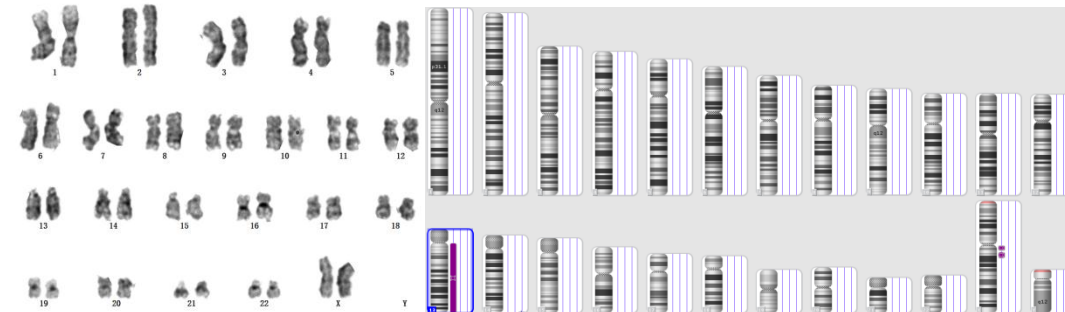

**Figure S12.1:** Normal Metaphase Cytogenetics indicates 46,XX [20].

**Figure S12.2:** SNP-A results indicate cryptic UPD(13q11qter), UPD(Xq11.1q13.1), and UPD(Xq13.1q21.1).

**Table S12:**Chromosomal lesions detected by SNP-A in Case 12#.

| Type | Microarray Nomenclature                             | Size(Kbp) | CN state |
|------|-----------------------------------------------------|-----------|----------|
| UPD  | arr[hg19]<br>13q11qter(19,450,956-115,095,705) hmz  | 95,645    | 2        |
| UPD  | arr[hg19]<br>Xq11.1q13.1(62,036,670-68,187,282) hmz | 6,151     | 2        |
| UPD  | arr[hg19]<br>Xq13.1q21.1(71,380,957-78,955,504) hmz | 7,575     | 2        |

**Case 13#**, male, 4 years old, sAML

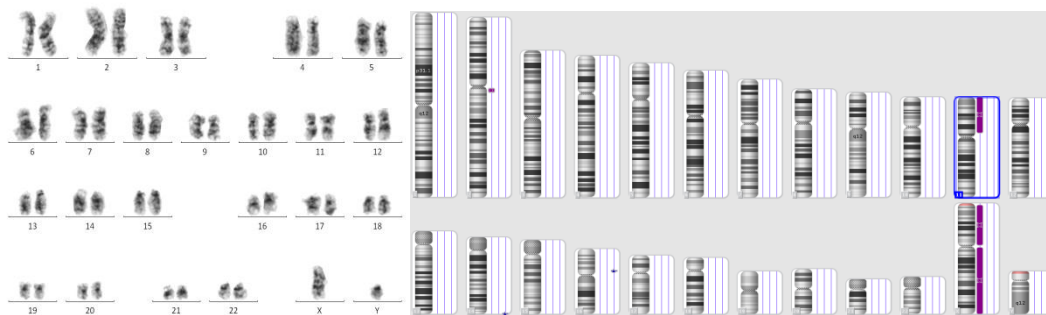

**Figure S13.1:** Normal Metaphase Cytogenetics indicates 46,XY [20].

**Figure S13.2:** SNP-A results indicate cryptic UPD(2q11.1q11.2), and UPD(11p11.2pter).

**Table S13:**Chromosomal lesions detected bySNP-A in Case 13#.

| Type | Microarray Nomenclature                               | Size(Kbp) | CN state |
|------|-------------------------------------------------------|-----------|----------|
| UPD  | arr[hg19]<br>2q11.1q11.2 (95,550,957-100,690,354) hmz | 5,139     | 2        |
| UPD  | arr[hg19]<br>11p11.2pter (230,750-47,934,723) hmz     | 47,704    | 2        |

**Case 14#**, male, 34 years old, RA

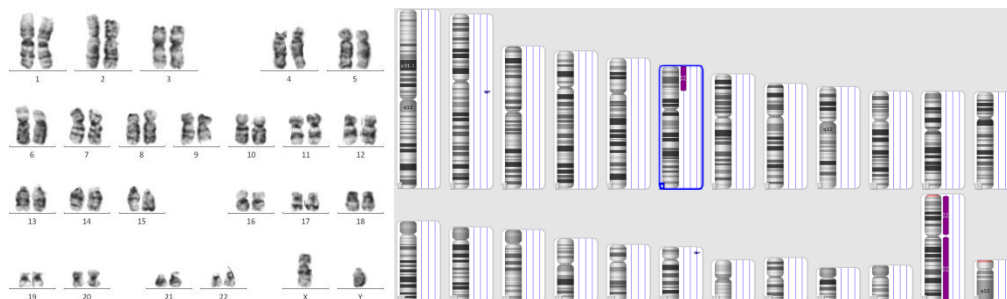

**Figure S14.1:** Normal Metaphase Cytogenetics indicates 46,XY [20].

**Figure S14.2:** SNP-A results indicate cryptic UPD(6p21.31pter).

**Table S14:**Chromosomal lesions detected bySNP-A in Case 14#.

| Type | Microarray Nomenclature                           | Size(Kbp) | CN state |
|------|---------------------------------------------------|-----------|----------|
| UPD  | arr[hg19]<br>6p21.31pter (203,877-35,213,540) hmz | 35,010    | 2        |



**Case 15#**, female, 76 years old, RAEB-2

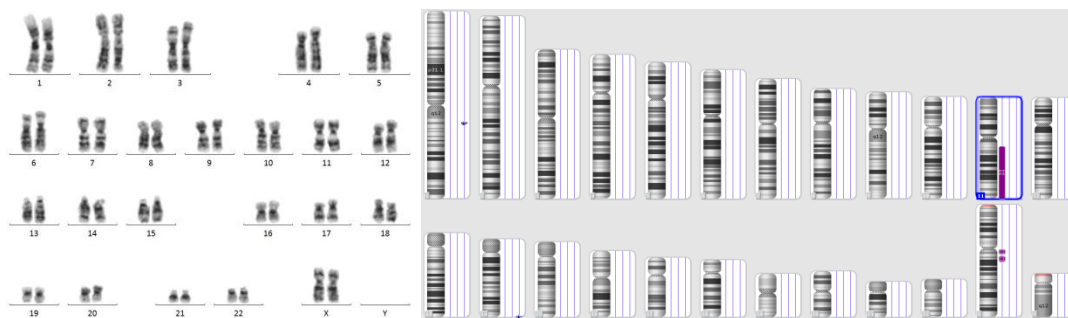

**Figure S15.1:** Normal Metaphase Cytogenetics indicates 46,XX [20].

**Figure S15.2:** SNP-A results indicate cryptic UPD(11q13.1qter).

**Table S15:** Chromosomal lesions detected by SNP-A in Case 15#.

| Type | Microarray Nomenclature                               | Size(Kbp) | CN state |
|------|-------------------------------------------------------|-----------|----------|
| UPD  | arr[hg19]<br>11q13.1qter (65,598,440-134,930,689) hmz | 69,332    | 2        |

**Case 16#**, female, 51 years old, RCMD

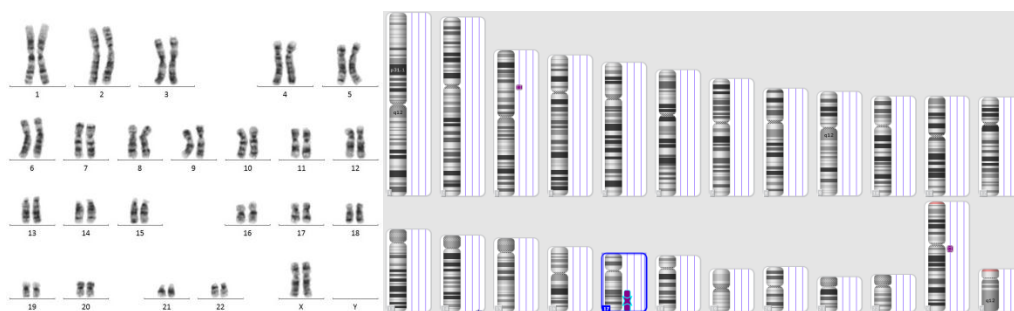

**Figure S16.1:** Normal Metaphase Cytogenetics indicates 46,XX [20].

**Figure S16.2:** SNP-A results indicate cryptic UPD(3p21.31p21.1) and UPD(17q22qter).

**Table S16:** Chromosomal lesions detected by SNP-A in Case 16#.

| Type | Microarray Nomenclature                              | Size(Kbp) | CN state |
|------|------------------------------------------------------|-----------|----------|
| UPD  | arr[hg19]<br>3p21.31p21.1(46,895,299-53,285,424) hmz | 6,390     | 2        |
| UPD  | arr[hg19]<br>17q22qter (51,863,665-81,041,760) hmz   | 29,178    | 2        |

Case 17#, male, 43 years old, MDS-U

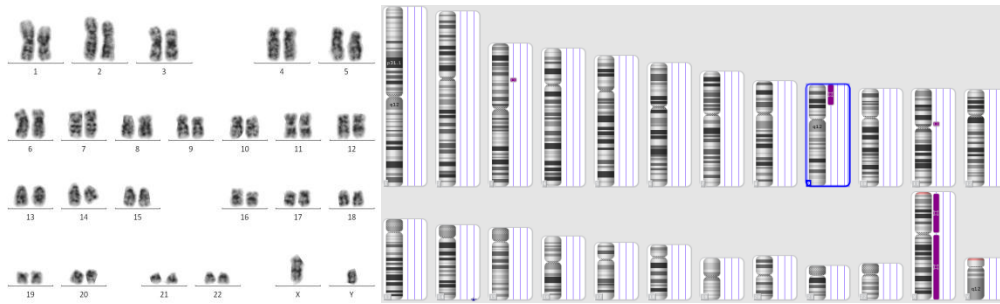

**Figure S17.1:** Normal Metaphase Cytogenetics indicates 46,XY [20].

**Figure S17.2:** SNP-A results indicate cryptic UPD(3p21.31p21.1), UPD(9p21.1pter), and UPD(11p11.2p11.12).

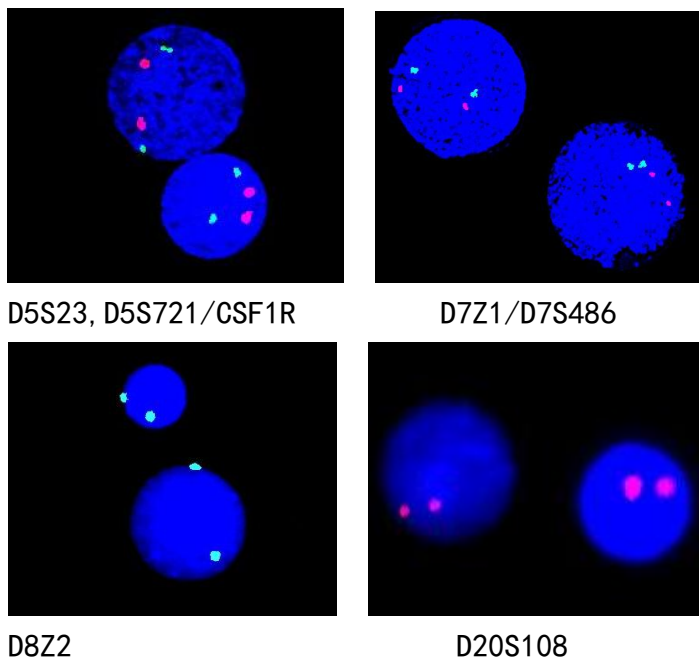

**Figure S17.3:** FISH indicates normal chromosome 5,7,8,20.

nuc ish(D5S23,D5S721×2),(CSF1R×2)[400]; nuc ish(D7Z1×2),(D7S486×2)[400]  
nuc ish(D8Z2×2)[400]; nuc ish(D20S108×2)[400]

**Table S17:**Chromosomal lesions detected by SNP-A in Case 17#.

| Type | Microarray Nomenclature                                | Size(Kbp) | CN state |
|------|--------------------------------------------------------|-----------|----------|
| UPD  | arr[hg19]<br>3p21.31p21.1(47,388,439-52,595,417) hmz   | 5,207     | 2        |
| UPD  | arr[hg19]<br>9p21.1pter (216,123-28,254,742) hmz       | 28,039    | 2        |
| UPD  | arr[hg19]<br>11p11.2p11.12 (45,662,054-51,550,787) hmz | 5,889     | 2        |

**Case 18#**, male, 77 years old, RARS

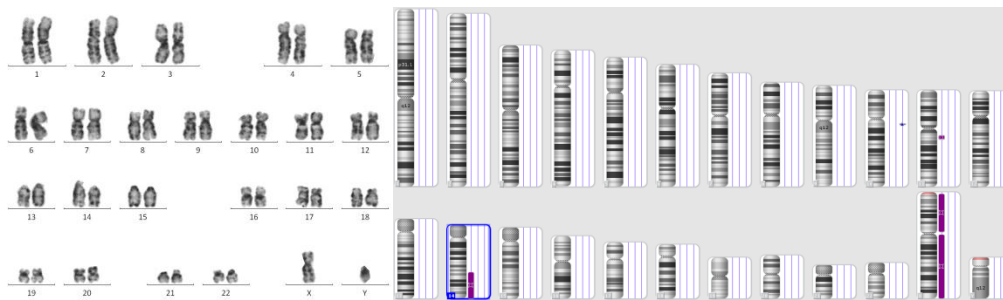

**Figure S18.1:** Normal Metaphase Cytogenetics indicates 46,XY [20].

**Figure S18.2:** SNP-A results indicate cryptic UPD(11q12.3q13.3) and UPD(14q24.1-qter).

**Table S18:**Chromosomal lesions detected by SNP-A in Case 18#.

| Type | Microarray Nomenclature                                | Size(Kbp) | CN state |
|------|--------------------------------------------------------|-----------|----------|
| UPD  | arr[hg19]<br>11q12.3q13.3(63,231,375-68,536,839) hmz   | 5,305     | 2        |
| UPD  | arr[hg19]<br>14q24.1-qter (69,088,578-107,279,475) hmz | 38,190    | 2        |

**Case 19#**, male, 75 years old, RA

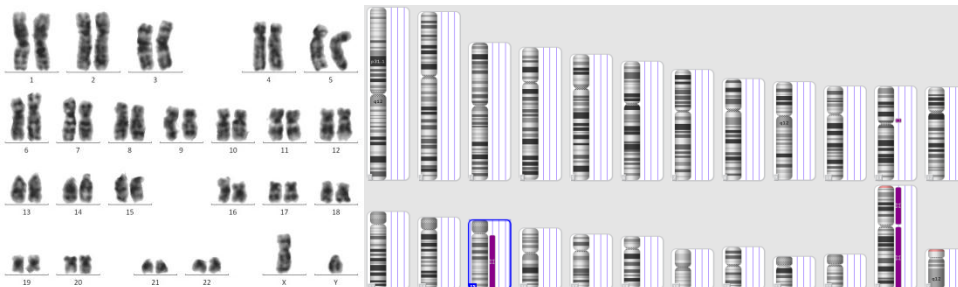

**Figure S19.1:** Normal Metaphase Cytogenetics indicates 46,XY [20].

**Figure S19.2:** SNP-A results indicate cryptic UPD(11p11.2p11.12) and UPD(15q11.2qter).

**Table S19:**Chromosomal lesions detected by SNP-A in Case 19#.

| Type | Microarray Nomenclature                               | Size(Kbp) | CN state |
|------|-------------------------------------------------------|-----------|----------|
| UPD  | arr[hg19]<br>11p11.2p11.12(46,240,816-51,550,787) hmz | 5,310     | 2        |
| UPD  | arr[hg19]<br>15q11.2qter (22,817,870-102,397,317) hmz | 79,579    | 2        |

**Case 20#**, male, 85 years old, RA

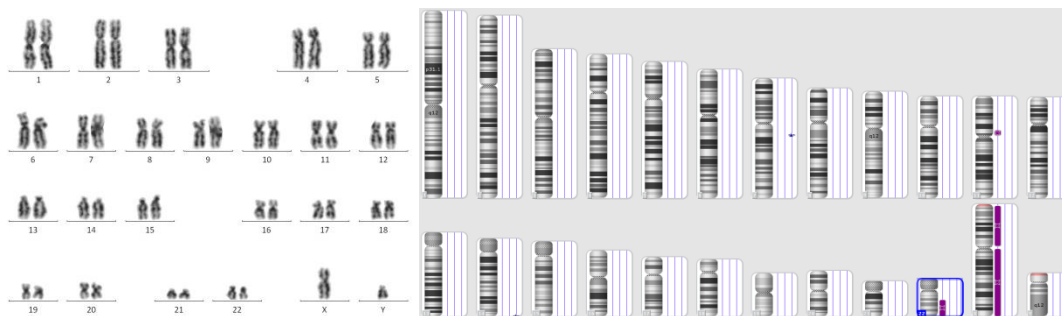

**Figure S20.1:** Normal Metaphase Cytogenetics indicates 46,XY [20].

**Figure S20.2:** SNP-A results indicate cryptic UPD(11p11.2p11.12) and UPD(22q12.1qter).

**Table S20:**Chromosomal lesions detected by SNP-A in Case 20#.

| Type | Microarray Nomenclature                               | Size(Kbp) | CN state |
|------|-------------------------------------------------------|-----------|----------|
| UPD  | arr[hg19]<br>11p11.2p11.12(45,267,714-51,550,787) hmz | 6,283     | 2        |
| UPD  | arr[hg19]<br>22q12.1qter (29,287,729-51,157,531) hmz  | 21,870    | 2        |

**Case 21#**, male, 80 years old, sAML

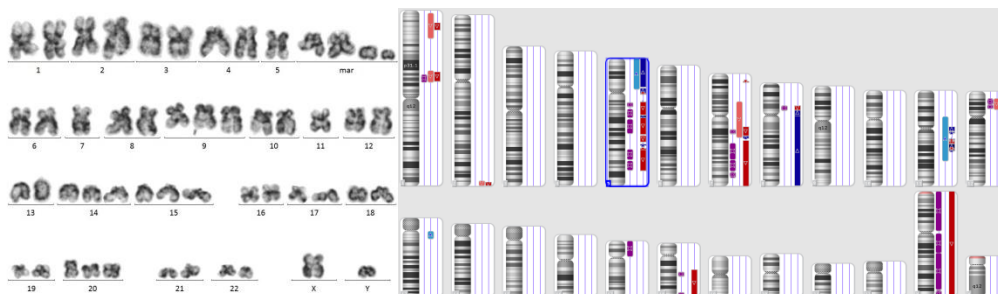

**Figure S21.1:** Metaphase Cytogenetics indicates 40~51,XY,ins(1)(p13p22p36),add(2)(q31),-5,-7,add(8)(p21),+9,add(9)(q34),?-11,+mar1,+mar2,inc[cp6]

**Figure S21.2:** SNP-A results indicate complex chromosomal aberrations (Table S21).

**Table S21:**Chromosomal lesions detected by SNP-A in Case 21#.

| Type | Microarray Nomenclature                              | Size(Kbp) | CN state |
|------|------------------------------------------------------|-----------|----------|
| Loss | arr[hg19]<br>1p22.3p21.2 (87,121,953-100,302,534)x1  | 13180     | 1        |
| Loss | arr[hg19]<br>1p36.13p36.11 (17,341,540-26,792,047)x1 | 9450      | 1        |
| Loss | arr[hg19]<br>5q14.3q21.3 (84,394,241-107,004,472)x1  | 22610     | 1        |
| Loss | arr[hg19]                                            | 64295     | 1        |

|            |                                                        |       |     |
|------------|--------------------------------------------------------|-------|-----|
|            | 7q21.3q36.3 (94,824,955-159,119,707)x1                 |       |     |
| UPD        | arr[hg19]<br>7q22.1q31.32 (98,809,403-121,480,975) hmz | 22671 | 2   |
| Gain       | arr[hg19]<br>8q11.1q24.3 (47,669,895-146,295,771)x3    | 98626 | 3   |
| GainMosaic | arr[hg19]<br>11p12q22.1 (36,846,374-99,250,161)x2-3    | 62404 | 2.3 |
| LossMosaic | arr[hg19]<br>12p13.31p12.1 (10,091,075-25,410,539)x1-2 | 15319 | 1.4 |
| GainMosaic | arr[hg19]<br>13q11q12.3 (19,436,286-29,890,054)x2-3    | 10454 | 2.2 |
| UPD        | arr[hg19]<br>17p13.3p11.2 (18,900-22,170,994) hmz      | 22152 | 2   |
| Loss       | arr[hg19]<br>18q12.3q23 (38,932,938-78,013,728)x1      | 39081 | 1   |

Case 22#, male, 71 years old, sAML

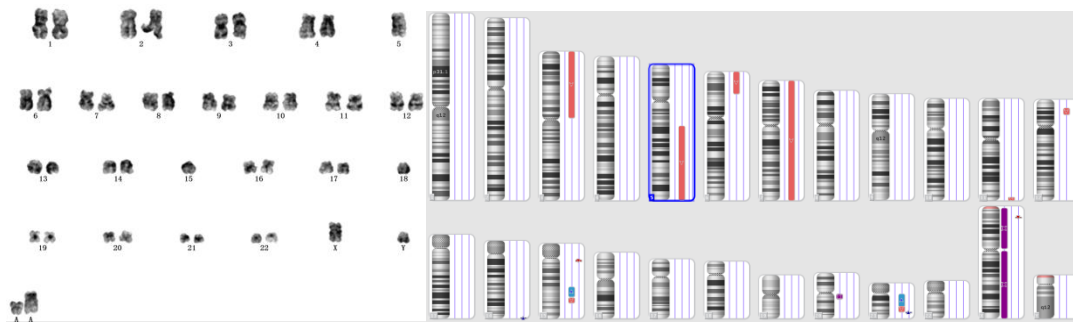

**Figure S22.1:** Metaphase Cytogenetics indicates 41~45,XY,del(2)(q33),-5,del(7)(p13), add(11)(q23), +2~3mar,inc[cp5]/46,XY[2]

**Figure S22.2:** SNP-A results indicate complex chromosomal aberrations (Table S22).

**Table S22:** Chromosomal lesions detected by SNP-A in Case 22#.

| Type       | Microarray Nomenclature                               | Size(Kbp) | CN state |
|------------|-------------------------------------------------------|-----------|----------|
| LossMosaic | arr[hg19]<br>3p26.3p11.1 (61,891-88,225,600)x1-2      | 88164     | 1.6      |
| LossMosaic | arr[hg19]<br>5q14.2q35.3 (82,350,935-180,715,096)x1-2 | 98364     | 1.3      |
| LossMosaic | arr[hg19]<br>6p25.3p22.1 (156,974-29,150,160)x1-2     | 28993     | 1.6      |
| LossMosaic | arr[hg19]<br>7p22.3q36.3 (43,376-159,056,248)x1-2     | 159013    | 1.6      |
| LossMosaic | arr[hg19]<br>12p13.2p12.2(11,751,919-20,263,885)x1-2  | 8512      | 1.8      |
| GainMosaic | arr[hg19]<br>15q22.2q23 (59,622,460-72,570,680)x2-3   | 12948     | 2.3      |

|            |                                                        |       |     |
|------------|--------------------------------------------------------|-------|-----|
| LossMosaic | arr[hg19]<br>15q24.1q25.1(74,256,532-81,075,769)x1-2   | 6819  | 1.5 |
| UPD        | arr[hg19]<br>20q11.21q11.23(29,510,306-36,082,411) hmz | 6572  | 2   |
| LossMosaic | arr[hg19]<br>21q22.11q22.13(31,887,600-39,263,244)x1-2 | 7376  | 1.7 |
| GainMosaic | arr[hg19]<br>21q11.2q22.11(15,016,486-31,882,693)x2-3  | 16866 | 2.6 |

**Case 23#**, male, 28 years old, sAML

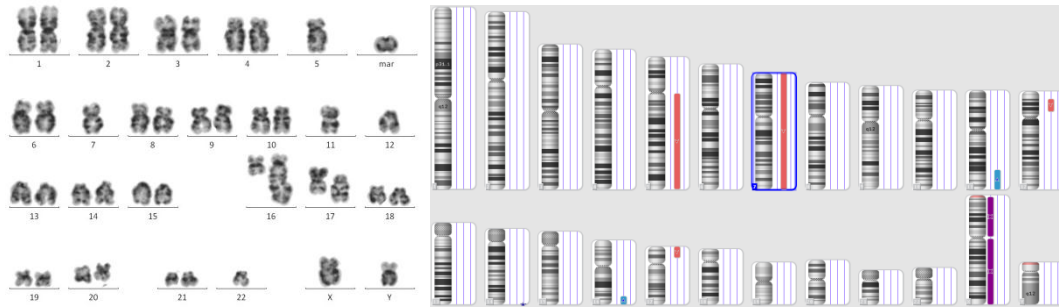

**Figure S23.1:** Metaphase Cytogenetics indicates

42,X,add(Y)(p11),-5,-7,-11,-12,del(12)(p11),add(16)(q24),add(17)(q25),add(17)(p13),-22,+r[16]/46,XY[4]

**Figure S23.2:** SNP-A results indicate complex chromosomal aberrations (Table S23).

**Table S23:**Chromosomal lesions detected by SNP-A in Case 23#.

| Type       | Microarray Nomenclature                               | Size(Kbp) | CN state |
|------------|-------------------------------------------------------|-----------|----------|
| LossMosaic | arr[hg19]<br>5q11.1q35.3(50,364,961-180,715,096)x1-2  | 130350    | 1.6      |
| LossMosaic | arr[hg19]<br>7p22.3q36.3(43,376-159,119,707)x1-2      | 159076    | 1.6      |
| GainMosaic | arr[hg19]<br>11q22.3q25(108,340,592-134,937,416)x2-3  | 26597     | 2.5      |
| LossMosaic | arr[hg19]<br>12p13.2p11.23(10,970,781-27,789,635)x1-2 | 16819     | 1.7      |
| GainMosaic | arr[hg19]<br>16q23.1q24.3(78,795,974-90,155,062)x2-3  | 11359     | 2.5      |
| LossMosaic | arr[hg19]<br>17p13.3p12 (525-15,068,104)x1-2          | 15067     | 1.7      |

Case 24#, male, 84 years old, sAML

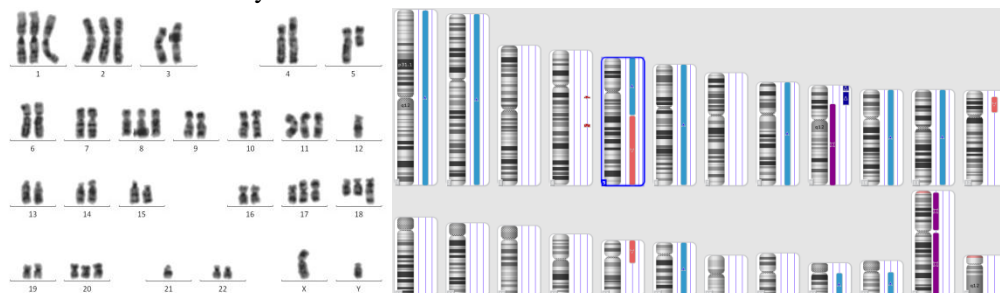

**Figure S24.1:** Metaphase Cytogenetics indicates

54~56,XY,+1,+2,der(4;12)(q10;q10),+5,del(5)(q13q31)×2, add(7)(q32),+8,+11,del(12)(p11),+17,i(17)(q10)×2,+add(18)(q23),+21,+22[cp18]/46,XY[2]

**Figure S24.2:** SNP-A results indicate complex chromosomal aberrations (Table S24).

**Table S24:**Chromosomal lesions detected by SNP-A in Case 24#.

| Type       | Microarray Nomenclature                               | Size(Kbp) | CN state |
|------------|-------------------------------------------------------|-----------|----------|
| GainMosaic | arr[hg19]<br>1p36.33q44(849,466-249,224,684)x2-3      | 248375    | 2.7      |
| GainMosaic | arr[hg19]<br>2p25.3q37.3(12,770-242,782,258)x2-3      | 242769    | 2.6      |
| GainMosaic | arr[hg19]<br>5p15.33q14.2(113,576-81,475,075)x2-3     | 81361     | 2.6      |
| LossMosaic | arr[hg19]<br>5q14.3q35.3(83,005,173-180,715,096)x1-2  | 97710     | 1.2      |
| GainMosaic | arr[hg19]<br>6p25.3q27(156,974-170,914,297)x2-3       | 170757    | 2.7      |
| GainMosaic | arr[hg19]<br>8p23.3q24.3(158,048-146,295,771)x2-3     | 146138    | 2.7      |
| Gain       | arr[hg19]<br>9p23p21.2(9,027,217-26,610,103)x3        | 17583     | 3        |
| UPD        | arr[hg19]<br>9p21.2q34.3(25,953,109-141,011,581) hmz  | 115058    | 2        |
| GainMosaic | arr[hg19]<br>10p15.3q26.3(100,047-135,426,386)x2-3    | 135326    | 2.6      |
| GainMosaic | arr[hg19]<br>11p15.5q25(230,680-134,937,416)x2-3      | 134707    | 2.7      |
| LossMosaic | arr[hg19]<br>12p13.31p11.21(9,228,433-30,790,954)x1-2 | 21562     | 1.4      |
| LossMosaic | arr[hg19]<br>17p13.3q12(525-32,850,419)x1-2           | 32849     | 1.3      |
| GainMosaic | arr[hg19]<br>18p11.32q23(136,227-78,013,728)x2-3      | 77877     | 2.6      |
| GainMosaic | arr[hg19]<br>21q11.2q22.3(15,016,486-48,093,361)x2-3  | 33076     | 2.7      |

|            |                                                       |       |     |
|------------|-------------------------------------------------------|-------|-----|
| GainMosaic | arr[hg19]<br>22q11.1q13.33(16,888,899-51,197,766)x2-3 | 34308 | 2.7 |
|------------|-------------------------------------------------------|-------|-----|

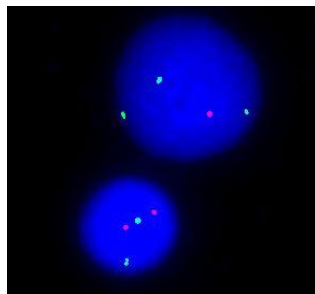

D5S23, D5S721/CSF1R

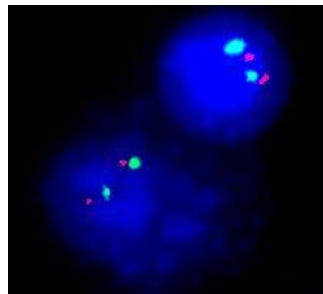

D7Z1/D7S486

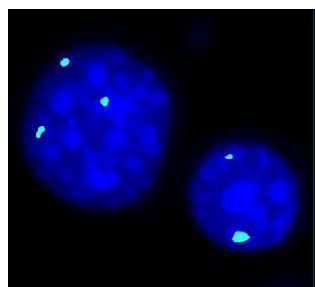

D8Z2

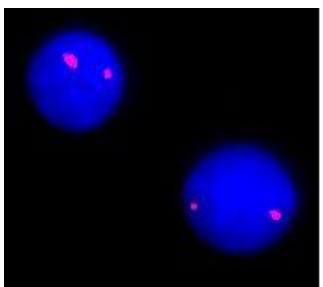

D20S108

FISH indicates:

nuc ish(D5S23,D5S721 × 3),(CSF1R × 1)[152/400]

nuc ish(D7Z1 × 2),(D7S486 × 2)[400]

nuc ish(D8Z2 × 3)[120/400]

nuc ish(D20S108 × 2)[400]

Case 25#, female, 53 years old, sAML

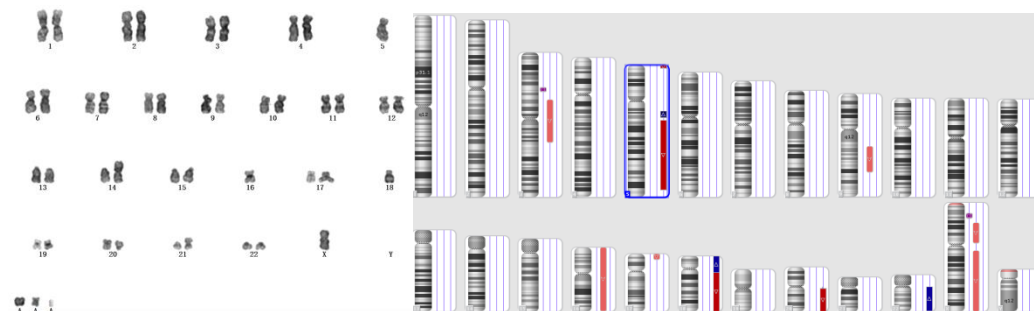

**Figure S25.1:** Metaphase Cytogenetics indicates

41~44,X,-X,-5,add(14)(p11),-16,-18, ?del(20)(q11),add(21)(p11),+r,+mar,1dmin[cp9]/46,XX[1]

**Figure S25.2:** SNP-A results indicate additional chromosomal aberrations (Table S25).



**Table S25:**Chromosomal lesions detected by SNP-A in Case 25#.

| Type       | Microarray Nomenclature                               | Size(Kbp) | CN state |
|------------|-------------------------------------------------------|-----------|----------|
| LossMosaic | arr[hg19]<br>3p14.1q21.1(64,586,466-122,786,085)x1-2  | 58200     | 1.7      |
| UPD        | arr[hg19]<br>3p21.31p21.1(47,375,954-52,595,417) hmz  | 5219      | 2        |
| Loss       | arr[hg19]<br>5q13.3q35.1(75,996,797-171,332,938)x1    | 95336     | 1        |
| Gain       | arr[hg19]<br>5q12.3q13.2(63,525,704-71,906,934)x4     | 8381      | 4        |
| LossMosaic | arr[hg19]<br>9q21.11q31.1(72,082,004-106,632,551)x1-2 | 34551     | 1.8      |
| LossMosaic | arr[hg19]<br>16p13.3q24.3(85,880-90,155,062)x1-2      | 90069     | 1.1      |
| LossMosaic | arr[hg19]<br>17p13.3p13.1(525-7,533,753)x1-2          | 7533      | 1.2      |
| Gain       | arr[hg19]<br>18p11.32q11.2(136,227-22,955,019)x3      | 22818     | 3        |
| Loss       | arr[hg19]<br>18q11.2q23(22,956,086-78,013,728)x1      | 55057     | 1        |
| Loss       | arr[hg19]<br>20q11.21q13.33(30,882,070-62,913,645)x1  | 32031     | 1        |
| Gain       | arr[hg19]<br>22q11.1q13.33(16,888,899-51,107,063)x3   | 34218     | 3        |
| LossMosaic | arr[hg19]<br>Xp21.3p11.21(28,447,571-56,696,092)x1-2  | 28248     | 1.7      |
| LossMosaic | arr[hg19]<br>Xq13.1q28(68,576,808-155,233,098)x1-2    | 86656     | 1.6      |
